# Supplementary material
Source: PubMed Central journal article supplement (PMC2268569)
Supplement: pnas_0712210105_1.pdf [file pnas_0712210105_1.pdf]

Col-0 **HSP90-RNAi/HSP90-RNAi** X **Ler<sup>+/+</sup>**

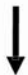

**F1 HSP90-RNAi/+**

Self single plant,  
Select for kanamycin-  
resistant progeny

**F2**

**F2**

**F2**

Self one randomly chosen plant  
per line per generation  
Select for kanamycin resistance

**F8 HSP90-RNAi/HSP90-RNAi**
