# Supplementary material
Source: PubMed Central journal article supplement (PMC2268569)

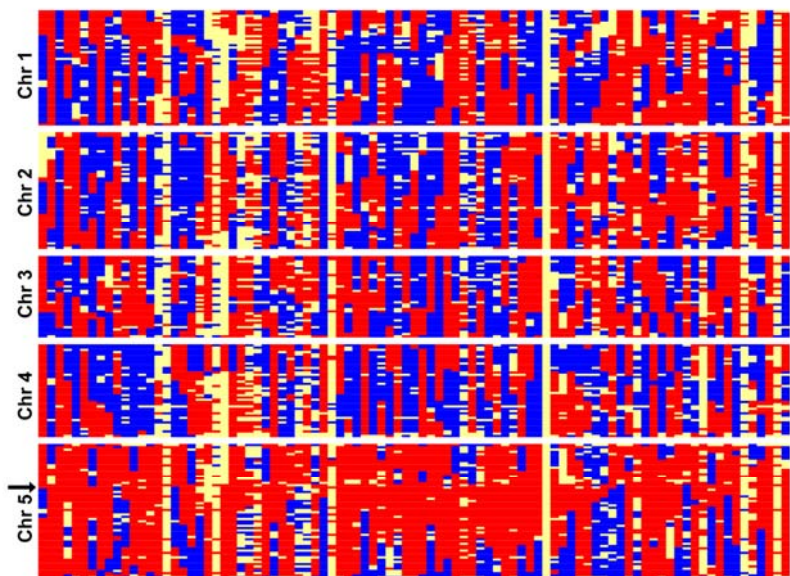

HSP90-RNAi RI Lines

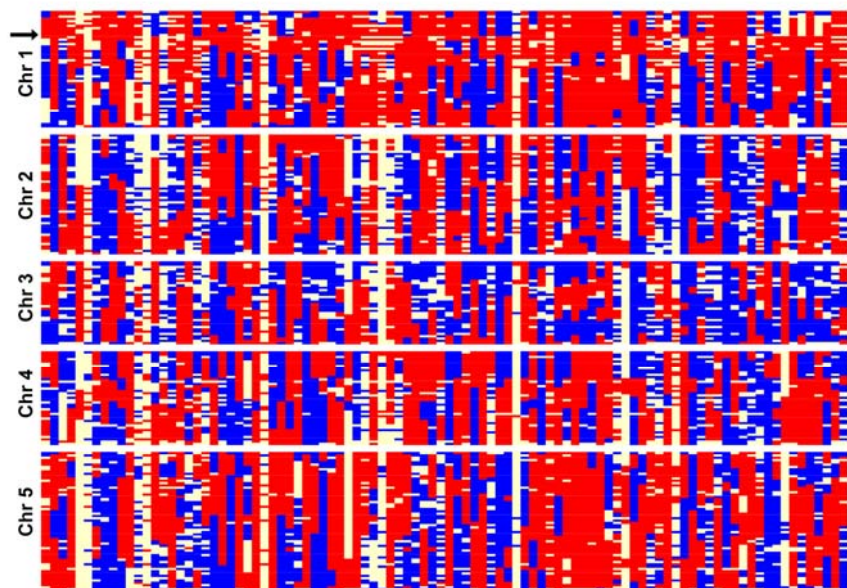

Control RI Lines

Supplement: pnas_0712210105_2.pdf [file pnas_0712210105_2.pdf]

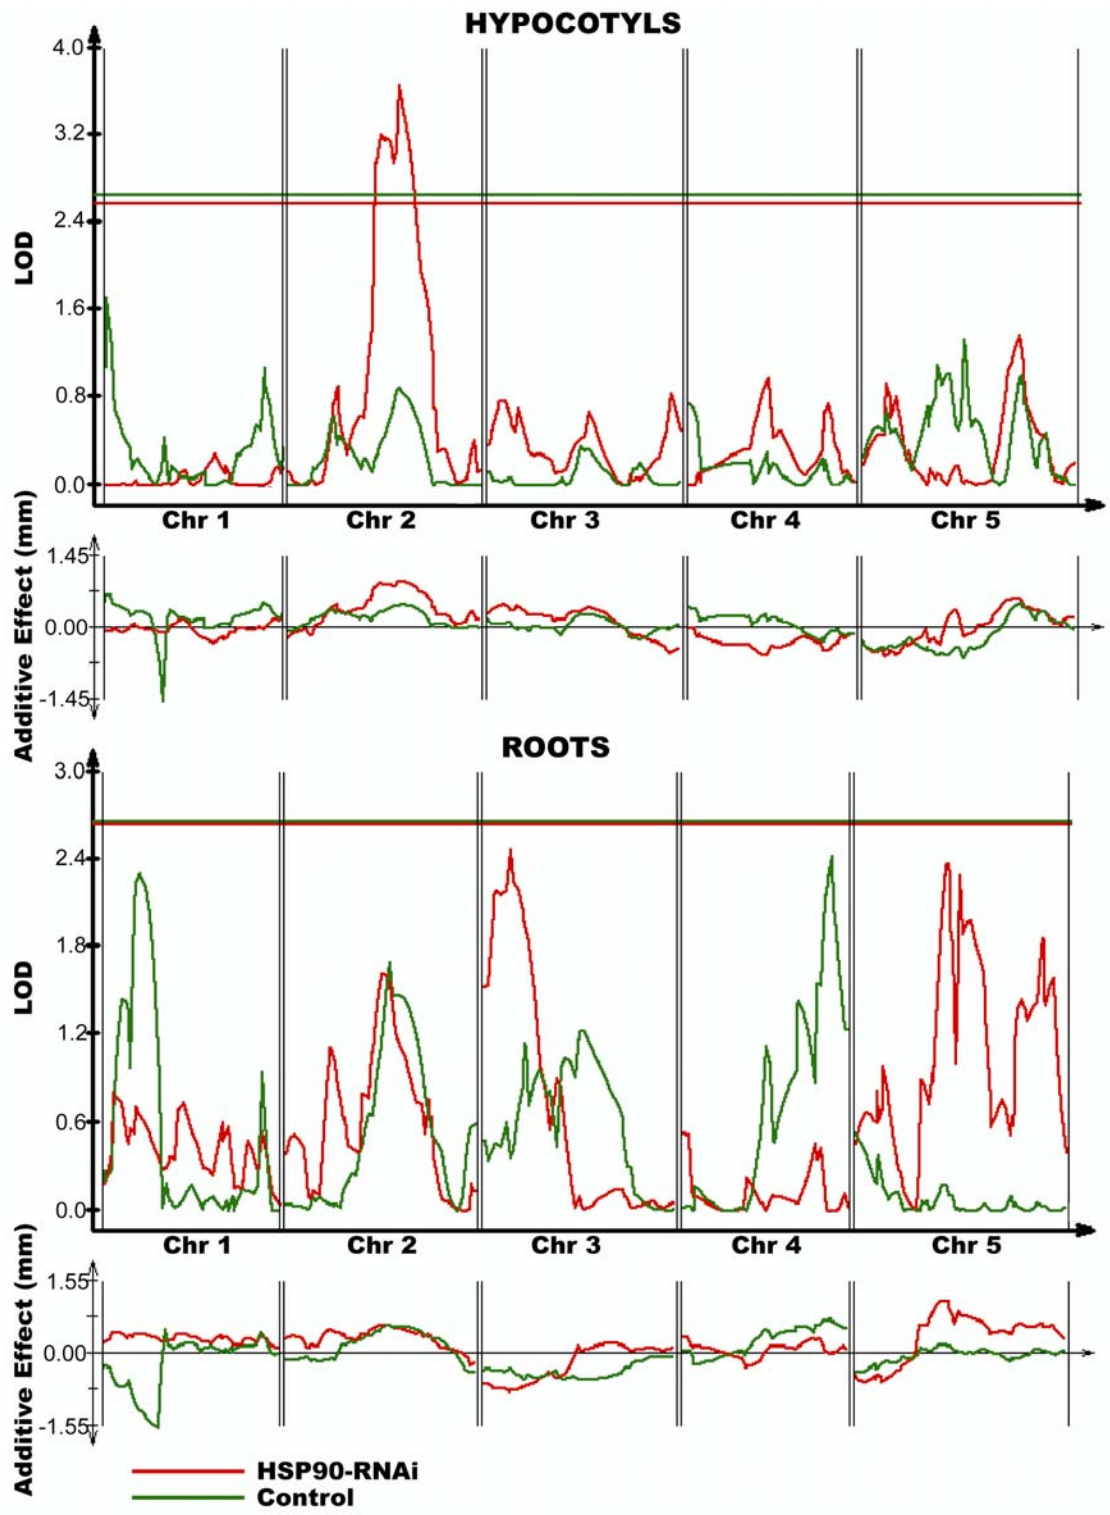

Supplement: pnas_0712210105_3.pdf [file pnas_0712210105_3.pdf]

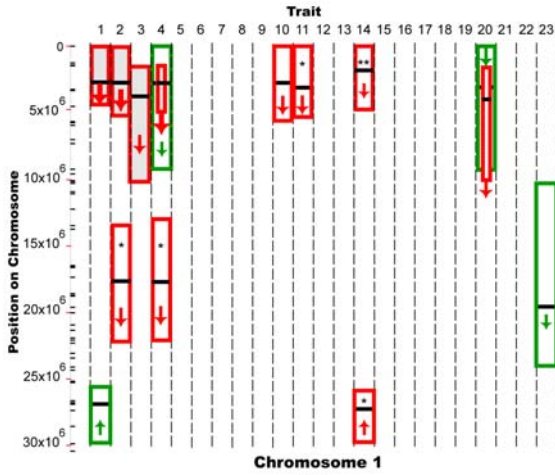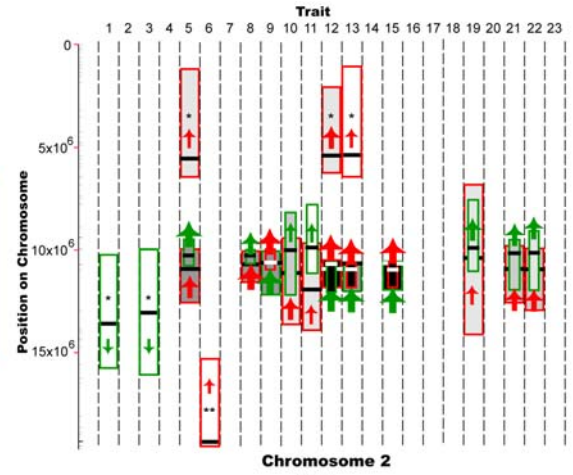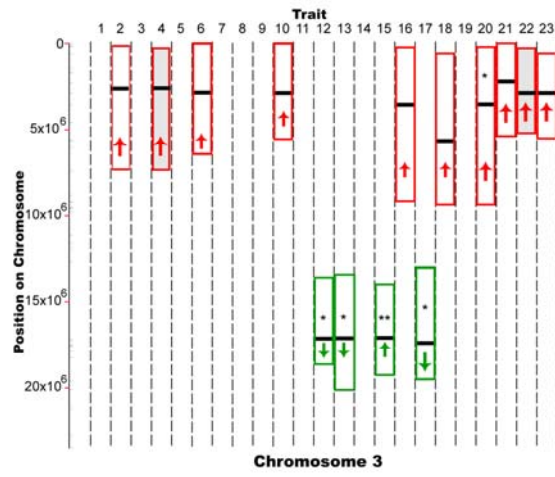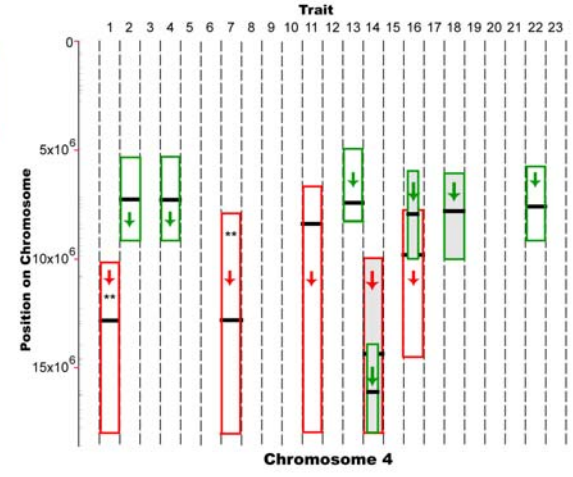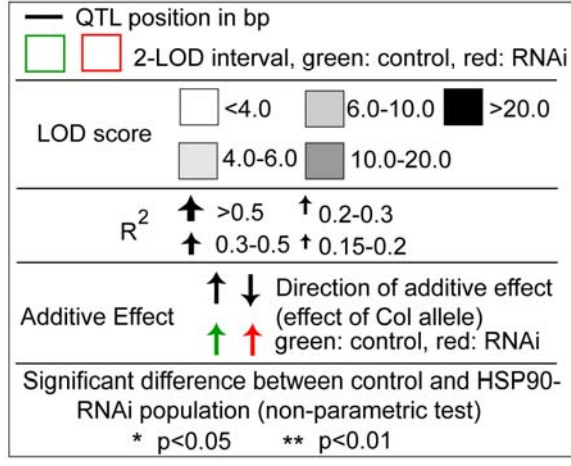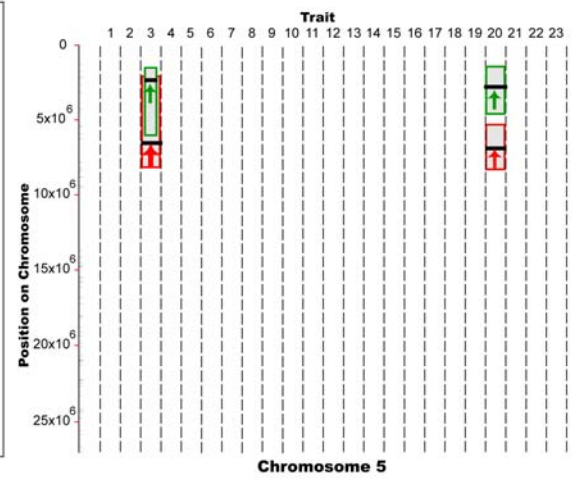

Supplement: pnas_0712210105_4.pdf [file pnas_0712210105_4.pdf]
